# Supplementary material for: Thickness-driven modulation of linear and nonlinear optical properties in La–Al co-doped ZnO thin films for optical limiting applications
Source: Royal Society of Chemistry journal article supplement (doi:10.1039/d6ra00168h), 2026-05-08
Supplement: d6ra00168h1.pdf [file d6ra00168h1.pdf]

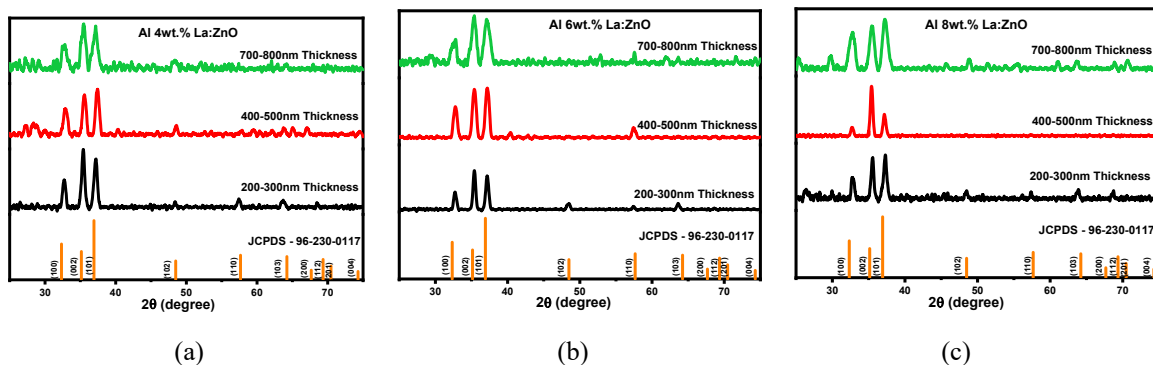

Fig.S1: X-ray diffraction patterns of 4wt.%, 6wt.% and 8wt.% of Al: LZO film

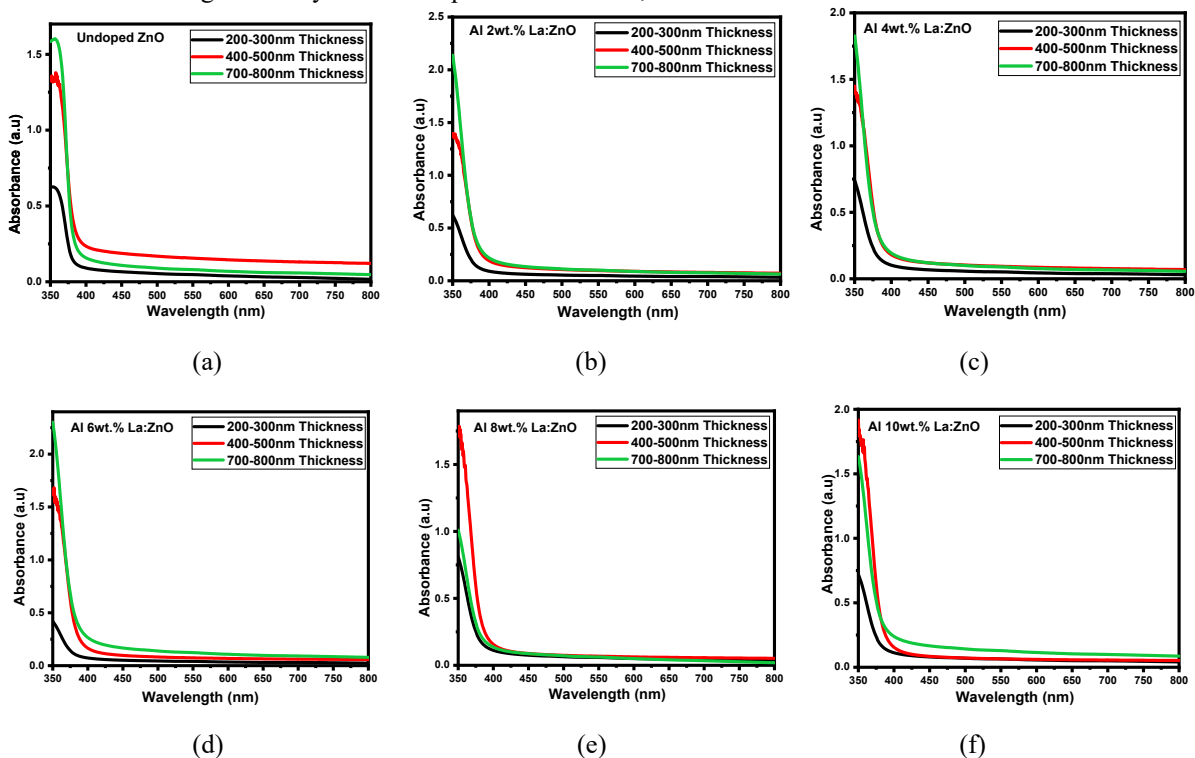

Fig.S2: Absorbances (a.u) v/s Wavelength (nm) of Al: LZO films of 0-10 wt.% (a-f).

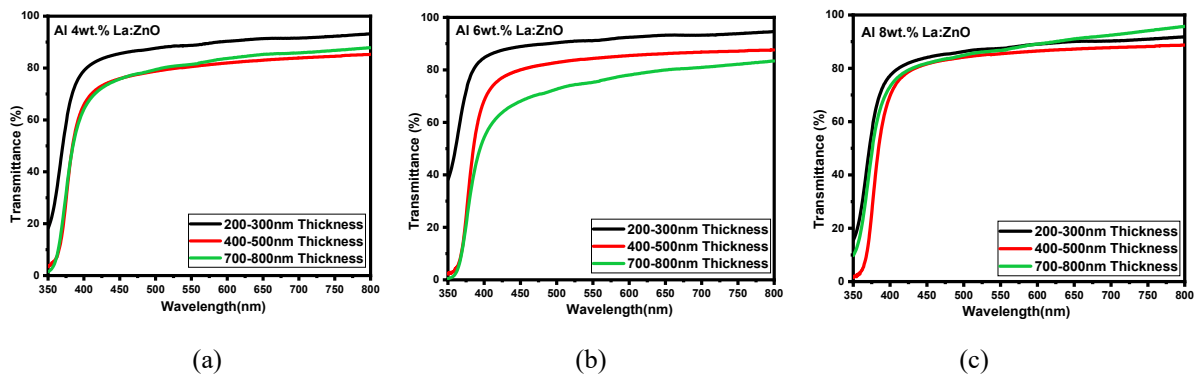

Fig.S3: Transmittance (a.u) v/s Wavelength (nm) of 4wt.%, 6wt.% and 8wt.% of Al: LZO films

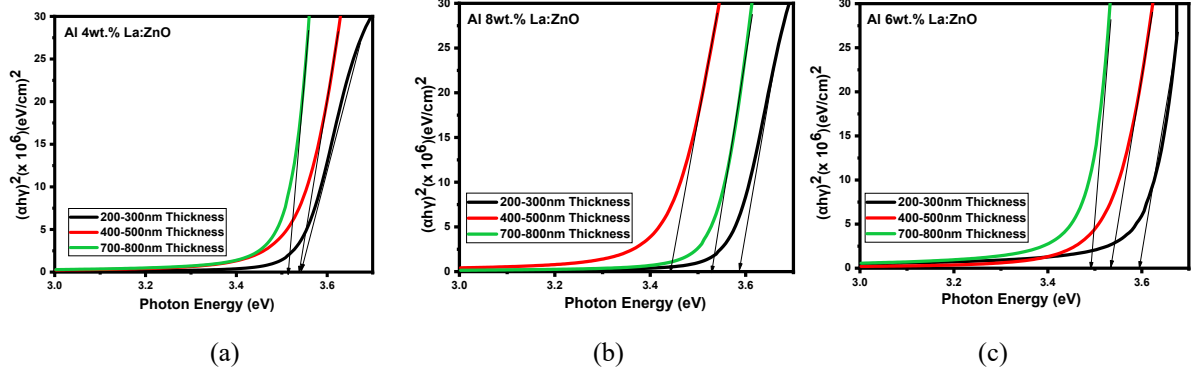

Fig.S4:  $(\alpha h\nu)^2$  Vs  $h\nu$  of 4wt.%, 6wt.% and 8wt.% of Al: LZO films

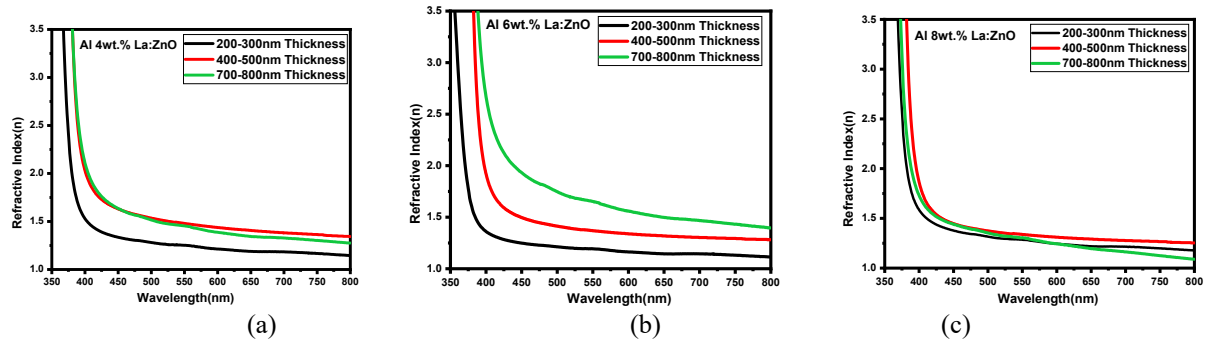

Fig.S5: Refractive index (R.I) Vs Wavelength ( $\lambda$ ) of 4wt.%, 6wt.% and 8wt.% of Al: LZO films

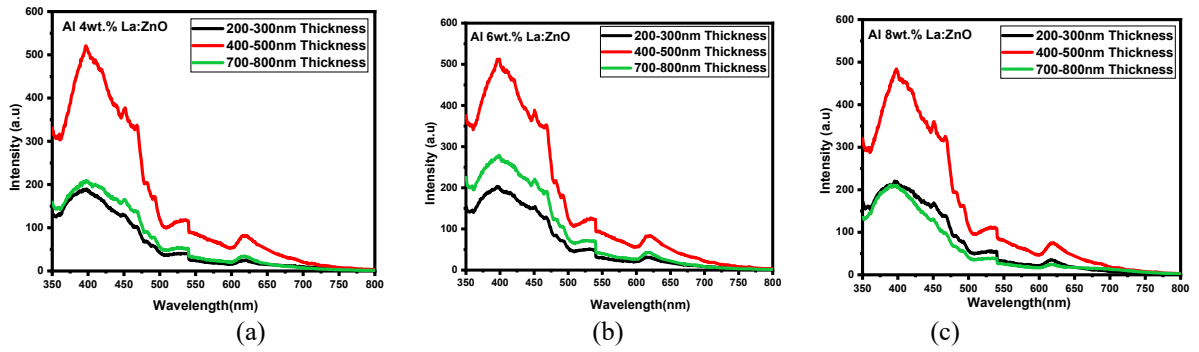

Fig.S6: PL intensity Vs Wavelength of 4wt.%, 6wt.% and 8wt.% of Al: LZO films

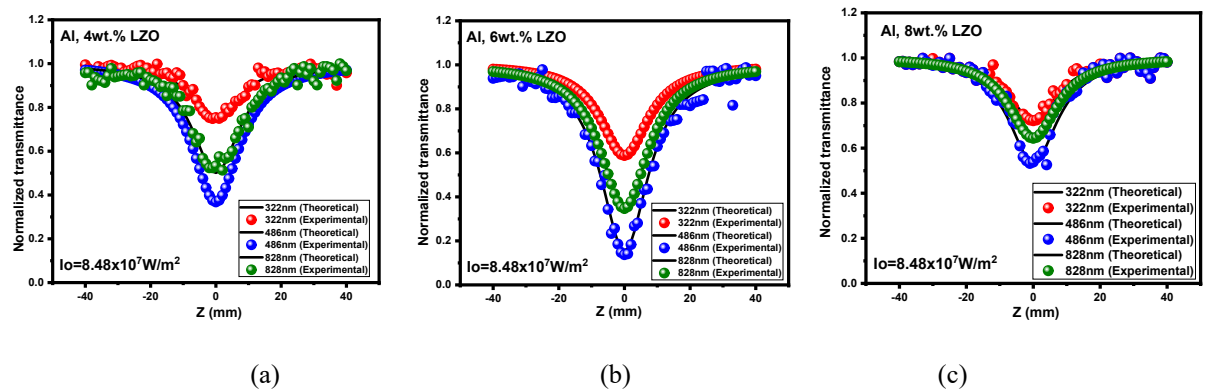

Fig.S7: OA traces of 4wt.%, 6wt.% and 8wt.% of Al: LZO films

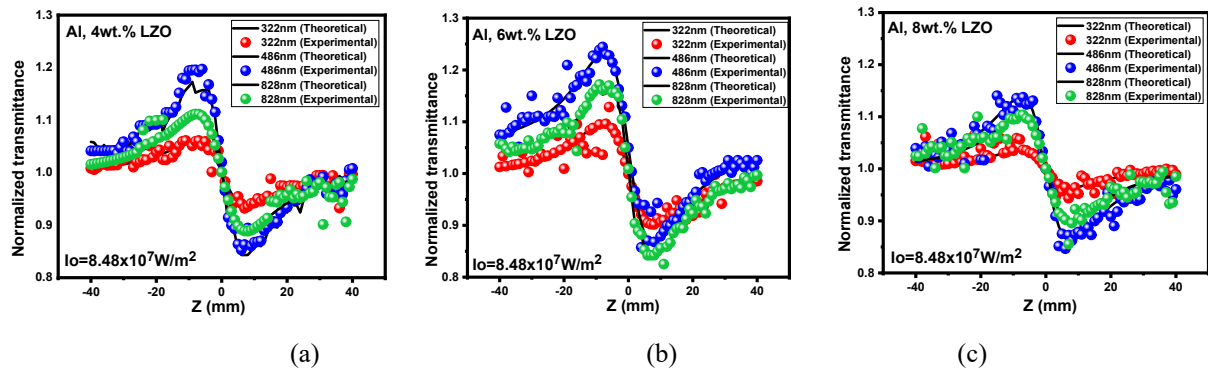

Fig.S8: CA traces of 4wt.%, 6wt.% and 8wt.% of Al: LZO films
